# Supplementary material for: Comparing interspecific socio-communicative skills of socialized juvenile dogs and miniature pigs
Source: PubMed Central journal article supplement (PMC6834752; doi:10.1007/s10071-019-01284-z), 2019-06-29
Supplement: 10071_2019_1284_MOESM2_ESM.pdf [file 10071_2019_1284_MOESM2_ESM.pdf]

**Supplementary Information for**

**Comparing interspecific socio-communicative skills of socialized juvenile dogs and  
miniature pigs**

**Authors and affiliations**

Linda Gerencsér<sup>1,2\*</sup>, Paula Perez Fraga<sup>1,2</sup>, Melinda Lovas<sup>1</sup>, Dóra Ujváry<sup>1</sup>, Attila Andics<sup>1,2</sup>

<sup>1</sup> Department of Ethology, Eötvös Loránd University, Budapest, Hungary

<sup>2</sup> MTA-ELTE ‘Lendület’ Neuroethology of Communication Research Group, Hungarian  
Academy of Sciences – Eötvös Loránd University, Budapest, Hungary

\*Correspondence: linda.gerencser@gmail.com

ORCID ID: <https://orcid.org/0000-0001-7030-178X>

Tel: +36 1 381 2179

Address: Department of Ethology, Eötvös Loránd University, 1117 Budapest, Pázmány P. s.  
1/C, Hungary

**Supplementary Tables**

| <b>Fixed effects</b> | <b>Estimate</b> | <b>Std. Error</b> | <b>df</b> | <b>t value</b> | <b>P value</b> |
|----------------------|-----------------|-------------------|-----------|----------------|----------------|
| Species              | -0.069          | 0.567             | 35.856    | -0.123         | 0.903          |
| Condition            | 1.328           | 0.549             | 18        | 2.419          | 0.026 *        |
| Species * Condition  | 1.529           | 0.776             | 18        | 1.97           | 0.064 .        |

Note. Significance codes: '\*\*\*\*' < 0.001; '\*\*\*' < 0.01; '\*' < 0.05; '.' < 0.1.

**Table S1** *P* values and related parameters for the main effects and their interaction on Body-orientation (LMM)

| <b>Contrast</b>             | <b>Estimate</b> | <b>SE</b> | <b>df</b> | <b>t ratio</b> | <b>P value</b> |
|-----------------------------|-----------------|-----------|-----------|----------------|----------------|
| Dog, Control - Pig, Control | 0.069           | 0.567     | 35.86     | 0.123          | 0.999          |
| Dog, Control - Dog, Food    | -1.328          | 0.549     | 18        | -2.419         | 0.109          |
| Pig, Control - Pig, Food    | -2.858          | 0.549     | 18        | -5.206         | 0.0003 ***     |
| Dog, Food - Pig, Food       | -1.460          | 0.567     | 35.86     | -2.574         | 0.0654 .       |

Note. Significance codes: '\*\*\*\*' < 0.001; '\*\*\*' < 0.01; '\*' < 0.05; '.' < 0.1. Tukey method for *P* value adjustment.

**Table S2.** *P* values and related parameters of the post hoc tests for the contrasts on Body-orientation

| <b>Fixed effects</b> | <b>Estimate</b> | <b>Std. Error</b> | <b>z value</b> | <b>P value</b> |
|----------------------|-----------------|-------------------|----------------|----------------|
| Species              | -0.046          | 0.487             | -0.095         | 0.924          |
| Condition            | 0.999           | 0.306             | 3.263          | 0.001 **       |
| Species * Condition  | 0.147           | 0.429             | 0.342          | 0.733          |

Note. Significance codes: '\*\*\*\*' < 0.001; '\*\*\*' < 0.01; '\*' < 0.05; '.' < 0.1.

**Table S3** *P* values and related parameters for the main effects and their interaction on Body-touch frequency (GLMM)

SUPPLEMENTARY INFORMATION FOR COMPARING INTERSPECIFIC SOCIO-COMMUNICATIVE SKILLS OF SOCIALIZED JUVENILE DOGS AND MINIATURE PIGS

| <b>Contrast</b>             | <b>Estimate</b> | <b>SE</b> | <b>df</b> | <b>z ratio</b> | <b>P value</b> |
|-----------------------------|-----------------|-----------|-----------|----------------|----------------|
| Dog, Control - Pig, Control | 0.046           | 0.487     | Inf       | 0.095          | 0.9997         |
| Dog, Control - Dog, Food    | -0.999          | 0.306     | Inf       | -3.263         | 0.006 **       |
| Pig, Control - Pig, Food    | -1.145          | 0.301     | Inf       | -3.806         | 0.0008 ***     |
| Dog, Food - Pig, Food       | -0.1            | 0.384     | Inf       | -0.262         | 0.994          |

Note. Results are given on the log (not the response) scale. Significance codes: '\*\*\*' < 0.001; '\*\*' < 0.01; '\*' < 0.05; '.' < 0.1. Tukey method for *P* value adjustment

**Table S4** *P* values and related parameters of the post hoc tests for the contrasts on Body-touch frequency

| <b>Fixed effects</b> | <b>Estimate</b> | <b>Std. Error</b> | <b>z value</b> | <b>P value</b> |
|----------------------|-----------------|-------------------|----------------|----------------|
| Species              | -1.601          | 0.519             | -3.083         | 0.002 **       |
| Condition            | 1.099           | 0.215             | 5.1            | <0.0001 ***    |
| Species * Condition  | 0.916           | 0.478             | 1.915          | 0.055 .        |

Note. Significance codes: '\*\*\*' < 0.001; '\*\*' < 0.01; '\*' < 0.05; '.' < 0.1.

**Table S5** *P* values and related parameters for the main effects and their interaction on Face-orientation frequency (GLMM)

| <b>Contrast</b>             | <b>Estimate</b> | <b>SE</b> | <b>df</b> | <b>z ratio</b> | <b>P value</b> |
|-----------------------------|-----------------|-----------|-----------|----------------|----------------|
| Dog, Control - Pig, Control | 1.601           | 0.519     | Inf       | 3.083          | 0.011 *        |
| Dog, Control - Dog, Food    | -1.099          | 0.215     | Inf       | -5.1           | <0.0001 ***    |
| Pig, Control - Pig, Food    | -2.015          | 0.427     | Inf       | -4.717         | <0.0001 ***    |
| Dog, Food - Pig, Food       | 0.684           | 0.327     | Inf       | 2.093          | 0.155          |

Note. Results are given on the log (not the response) scale. Significance codes: '\*\*\*' < 0.001; '\*\*' < 0.01; '\*' < 0.05; '.' < 0.1. Tukey method for *P* value adjustment.

**Table S6.** *P* values and related parameters of the post hoc tests for the contrasts on Face-orientation frequency

Supplementary Figure

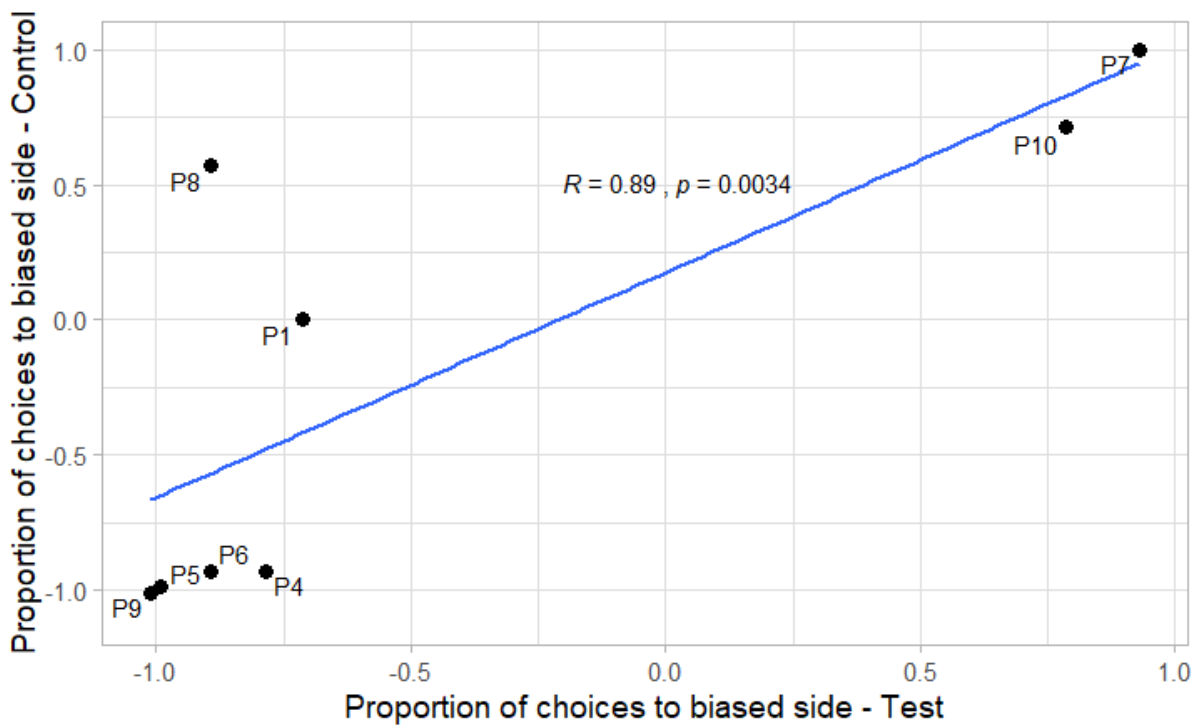

**Fig. S1** The proportion of choices to the biased side for each pig individual the in the test and control trials. Negative values show bias to the left, while positive values show bias to the right side. Data point labels stand for the individuals (corresponding to those on Fig. 7).
